# Supplementary material for: Characteristics of HIV target CD4 T cells collected using different sampling methods from the genital tract of HIV seronegative women
Source: PubMed Central journal article supplement (PMC5453484; doi:10.1371/journal.pone.0178193), 2017-06-01
Supplement: pone.0178193.s005.pdf [file pone.0178193.s005.pdf]

**Supplementary Table 1. Comparison of sample parameters and cell yields between included (n=25), excluded from all analyses (n=5) due to high visual blood or low cellular yield, and excluded from Table 2 cell yield analyses due to inadequate staining (n=8).**

|                                                                         | <b>Included<br/>(N=25)</b> | <b>Excluded from all<br/>(N=5)</b> | <b>Excluded from Table 2<br/>(N=8)</b> |
|-------------------------------------------------------------------------|----------------------------|------------------------------------|----------------------------------------|
| <b>CVL* blood dipstick (values 0 – 3)</b>                               | 2 (0 - 3)                  | 3 (3 - 3)                          | 2 (1 - 3)                              |
| <b>First CB visual blood score <math>\geq</math> 7 (values 0 – 10)</b>  | 2 (8%)                     | 2 (40%)                            | 0 (0%)                                 |
| <b>Second CB visual blood score <math>\geq</math> 7 (values 0 – 10)</b> | 1 (4%)                     | 1 (20%)                            | 0 (0%)                                 |
| <b>Semen (% testing positive)</b>                                       | 1 (4%)                     | 1 (20%)                            | 2 (25%)                                |
| <b>CVL* yield (total cells, million)</b>                                | 24 (15 - 46)               | 24 (20 - 62)                       | 26 (20 - 37)                           |
| <b>FS** yield (total cells, million)</b>                                | 4.1 (2.7 – 7.5)            | 8.7 (3.1 - 26)                     | 3.8 (2.8 - 7.5)                        |
| <b>CB*** yield (total cells, million)</b>                               | 15 (9.4 - 36)              | 32 (25 - 120)                      | 18 (12 - 32)                           |

\*CVL, cervicovaginal lavage; \*\*FS, flocked swab; \*\*\*CB, cytobrush

Median (range) shown for blood dipstick and qualitative blood score parameters; median (interquartile range) shown for total cell yields and CD4 phenotype.
